# Supplementary material for: ADSC-Exos containing MALAT1 promotes wound healing by targeting miR-124 through activating Wnt/β-catenin pathway
Source: Oxford University Press journal article supplement (doi:10.1042/bsr20192549), 2020-04-28
Supplement: bsr-2019-2549_supp.pdf [file bsr-2019-2549_supp.pdf]

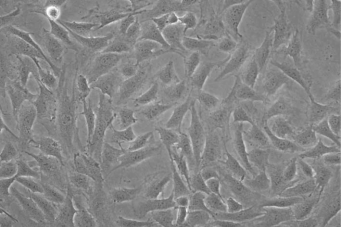

ADSC

**Supplementary Figure S1** Spindle ADSCs were observed through the microscope.  
×40 magnification.

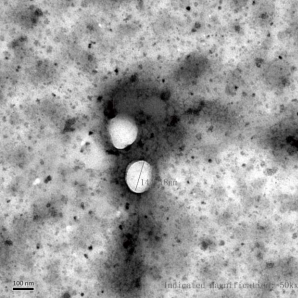

**Supplementary Figure S2** Transmission electron microscopy photomicrographs of exosomes. Scale bar, 100 nm.

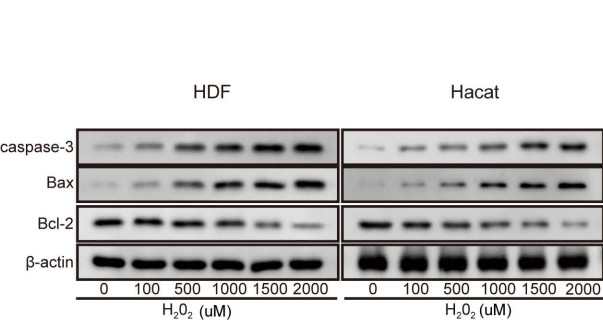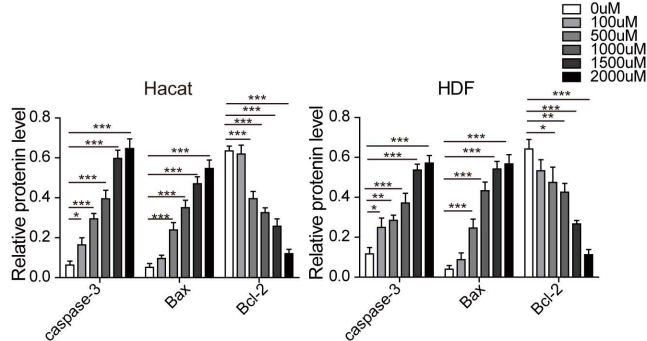

**Supplementary Figure S3** The Caspase3, Bax and Bcl-2 expression were detected by western blot assay.

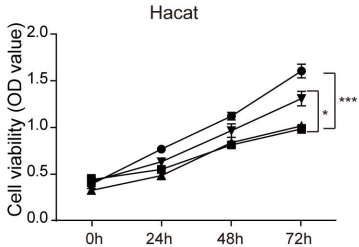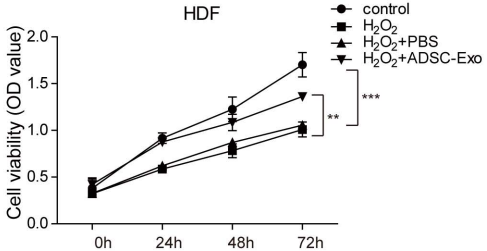

**Supplementary Figure S4** Cell proliferation of HaCaT and HDF cells was evaluated by CCK-8 assay.



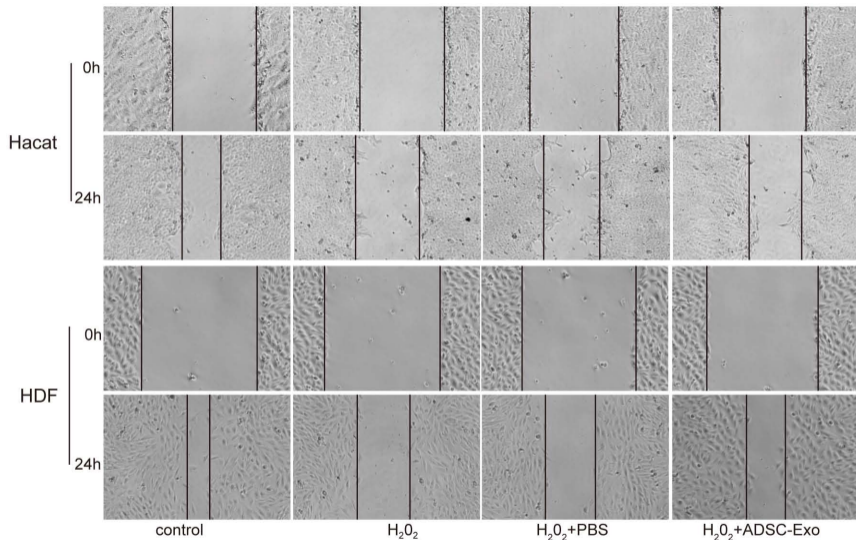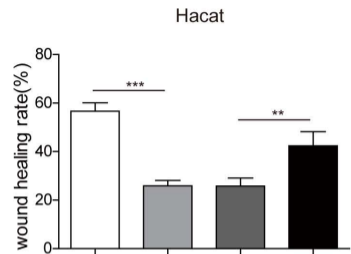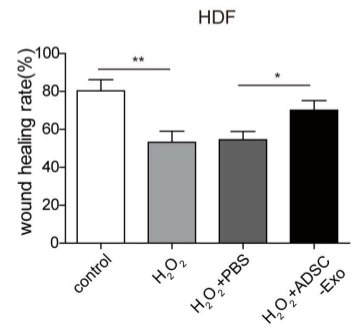

**Supplementary Figure S5** The capacity of cell migration in HaCaT and HDF cells was analyzed by the scratch wound healing assay.

Hacat

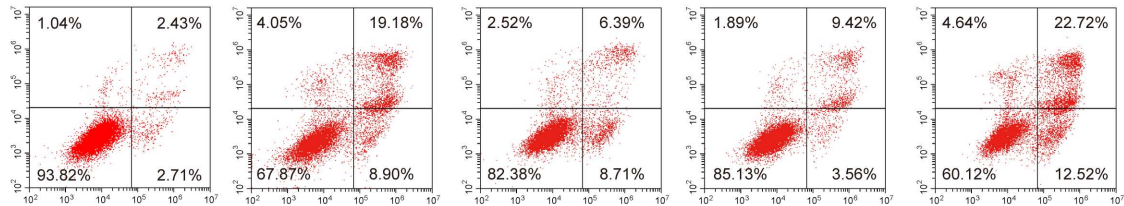

HDF

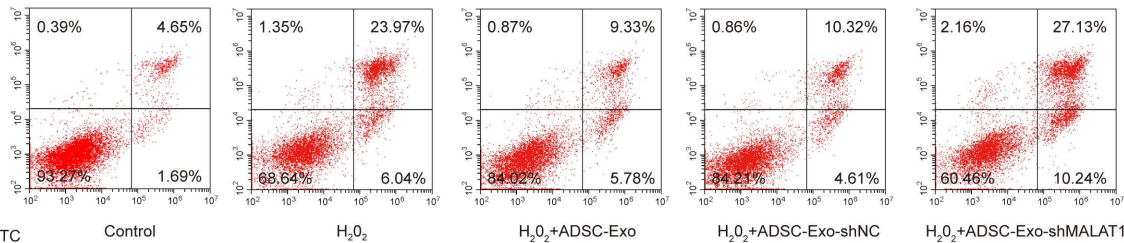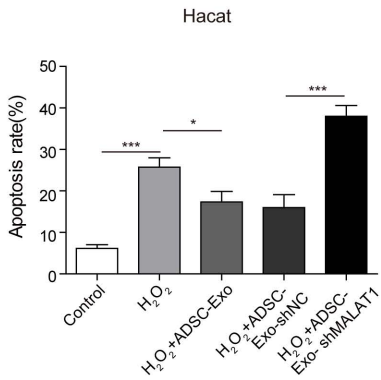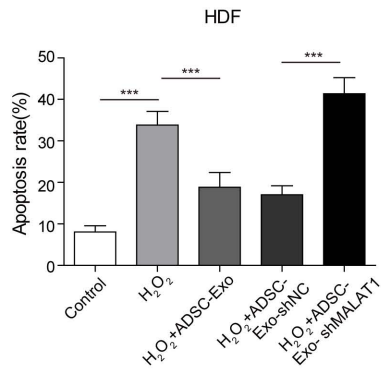

**Supplementary Figure S6** Apoptosis of HaCaT and HDF cells treated with H<sub>2</sub>O<sub>2</sub>, H<sub>2</sub>O<sub>2</sub>+ADSC-Exo, H<sub>2</sub>O<sub>2</sub>+ADSC-Exo-shNC or H<sub>2</sub>O<sub>2</sub>+ADSC-Exo-shMALAT1 were monitored by flow cytometry assay.

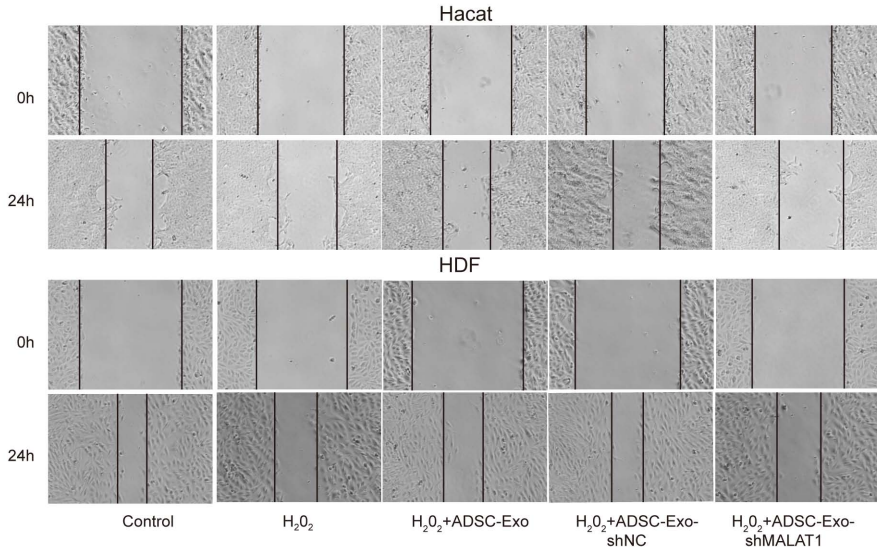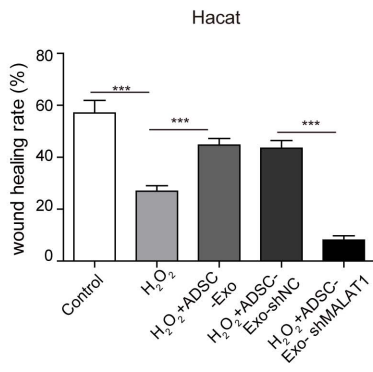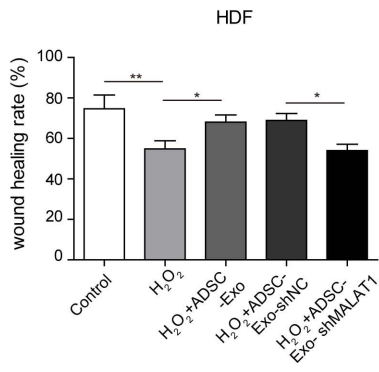

**Supplementary Figure S7** Migration of HaCaT and HDF cells treated with H<sub>2</sub>O<sub>2</sub>, H<sub>2</sub>O<sub>2</sub>+ADSC-Exo, H<sub>2</sub>O<sub>2</sub>+ADSC-Exo-shNC or H<sub>2</sub>O<sub>2</sub>+ADSC-Exo-shMALAT1 were analyzed by the scratch wound healing assay.

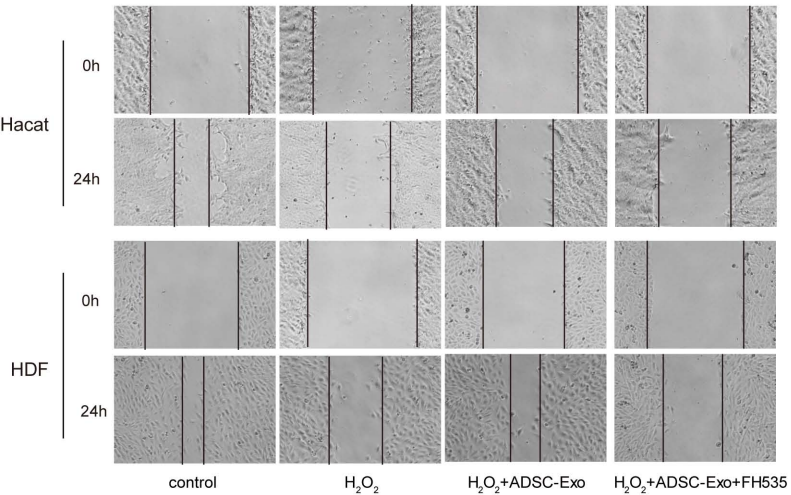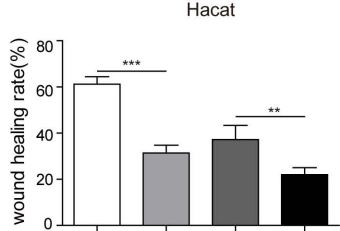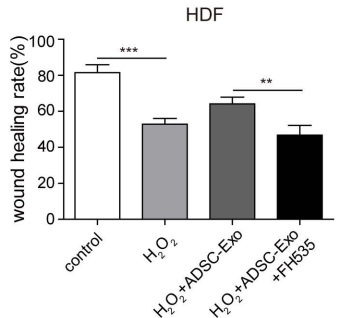

**Supplementary Figure S8** Migration of HaCaT and HDF cells treated with FH535

was performed using the scratch wound healing assay.
